# Supplementary material for: Neuroprotective Effects of TRPM7 Deletion in Parvalbumin GABAergic vs. Glutamatergic Neurons following Ischemia
Source: MDPI journal article supplement (doi:10.3390/cells11071178), 2022-03-31
Supplement: s1 [file s1]

# Supplementary Materials

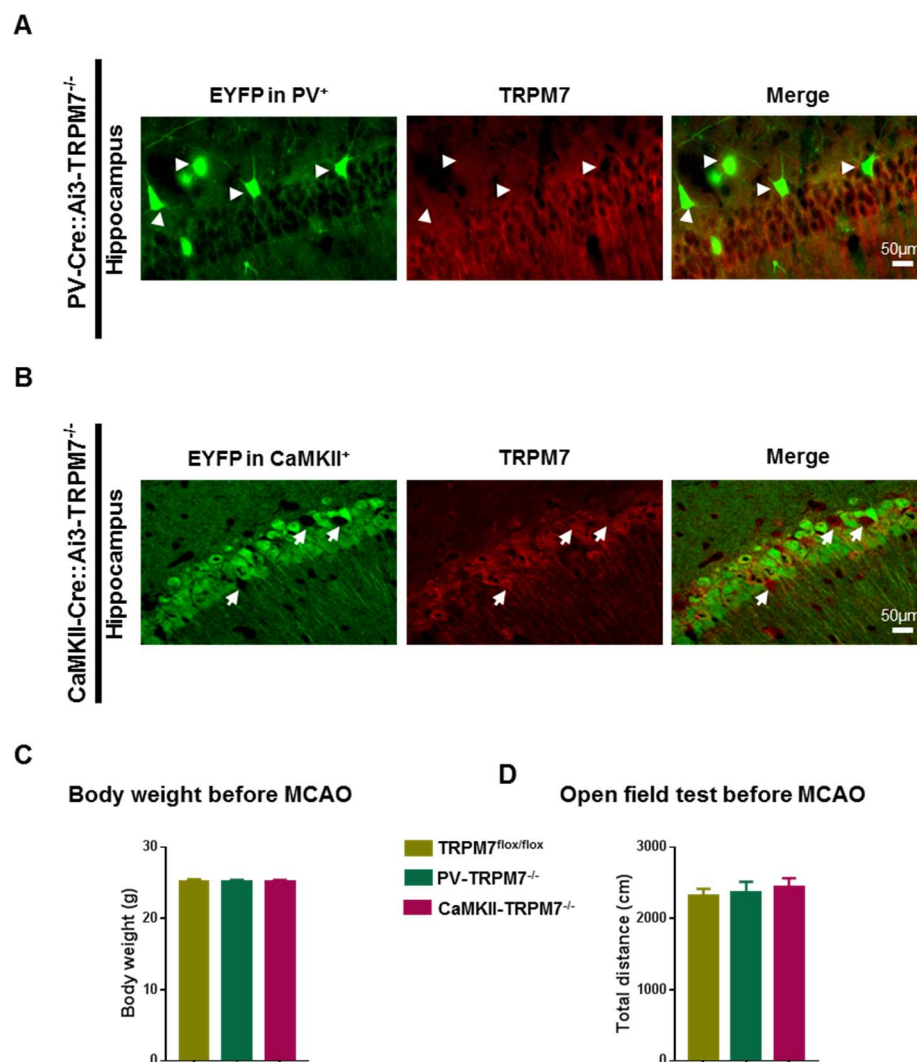

**Citation:** Zhang, P.; Li, W.; Liu, Y.; Gao, Y.; Abumaria, N. Neuroprotective Effects of TRPM7 Deletion in Parvalbumin GABAergic vs. Glutamatergic Neurons following Ischemia. *Cells* **2022**, *11*, 1178. <https://doi.org/10.3390/cells11071178>

Academic Editors: Lin-Hua Jiang, Xiaoqiang Yao and Bilal Çiğ

Received: 11 March 2022

Accepted: 29 March 2022

Published: 31 March 2022

**Publisher's Note:** MDPI stays neutral with regard to jurisdictional claims in published maps and institutional affiliations.

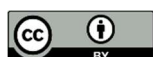

**Copyright:** © 2022 by the authors. Licensee MDPI, Basel, Switzerland. This article is an open access article distributed under the terms and conditions of the Creative Commons Attribution (CC BY) license (<https://creativecommons.org/licenses/by/4.0/>).

**Figure S1.** Confirmation of PV-TRPM7<sup>-/-</sup> or CaMKII-TRPM7<sup>-/-</sup> mice; body weight of experimental animals before MCAO; open-field test before MCAO. **(A)** Representative fluorescent images of PV-Cre::Ai3-TRPM7<sup>-/-</sup> brain sections stained with TRPM7 in the hippocampus. Arrows indicate the PV neurons did not have TRPM7 signal; **(B)** Representative fluorescent images of CaMKII-Cre::Ai3-TRPM7<sup>-/-</sup> brain sections stained with TRPM7 in the hippocampus. Arrows indicate the TRPM7 positive cells not co-localized with CaMKII neurons; **(C)** Quantitative analysis of the body weight before MCAO. *n* = 14 mice for the TRPM7<sup>flox/flox</sup> group, *n* = 15 mice for the PV-TRPM7<sup>-/-</sup> group, and *n* = 12 mice for the CaMKII-TRPM7<sup>-/-</sup> group; **(D)** Open-field test before MCAO. *n* = 5 mice for the TRPM7<sup>flox/flox</sup> group, *n* = 6 mice for PV-TRPM7<sup>-/-</sup> group, *n* = 7 mice for CaMKII-TRPM7<sup>-/-</sup> group. Data suggest the different genetic backgrounds did not affect locomotor activity in mice. All aforementioned data are expressed as mean ± SEM.

## Supplementary Experimental Procedures

### *Immunofluorescence*

PV-TRPM7<sup>-/-</sup> and CaMKII-TRPM7<sup>-/-</sup> mice were crossed with Ai3 reporter mice to generate PV-Cre::Ai3-TRPM7<sup>-/-</sup> and CaMKII-Cre::Ai3-TRPM7<sup>-/-</sup> mice expressing EYFP in GABAergic PV and glutamatergic CaMKII neurons (respectively). The PV-Cre::Ai3-TRPM7<sup>-/-</sup> and CaMKII-Cre::Ai3-TRPM7<sup>-/-</sup> mice were sacrificed under anesthesia and perfused with 4% paraformaldehyde. After gradient dehydration with 10%, 20%, and 30% sucrose, brain tissues were embedded in an optimum cutting temperature compound (OCT) tissue-freezing medium. Then, 25-μm frozen sections were prepared. All sections were blocked with blocking solution (5% goat serum and 0.3% Triton X-100) for 90 min at room temperature. Next, the sections were incubated overnight at 4 °C with the primary antibody of anti-TRPM7 (1:100, Alomone). After washing with 0.01 M PBS, sections were incubated with CF-647 (1:500, Biotium) conjugated secondary antibody for 2 h at room temperature and the stained sections were photographed using confocal microscopy systems (FV1000, Olympus).

### *Open-Field Test*

An open-field test was performed without ischemia exposure. Mice were placed in a 50 × 50 × 50 cm instrument for 5 min. Sessions were recorded and videos were analyzed by using Lime Light software (Coulbourn, USA).

**Table S1.** Results of normality test and variance homogeneity test of each Figure.  $p < 0.05$  means that the data do not meet normality or homogeneity of variance. NA, not applicable.

| Figure No.     | Results of Shapiro-Wilk Normality Test          |                                                |                                                  | Results of Variance Homogeneity Test (F Test) |              |
|----------------|-------------------------------------------------|------------------------------------------------|--------------------------------------------------|-----------------------------------------------|--------------|
|                | Group and $p$ -Value                            |                                                |                                                  |                                               |              |
| Figure 1B      | Sham<br>$p = 0.0638$                            | MCAO<br>$p < 0.001$                            | /                                                | NA                                            | NA           |
| Figure 1C      | Sham<br>$p = 0.7952$                            | MCAO<br>$p = 0.1185$                           | /                                                | F(53,53) = 2.449                              | $p = 0.0014$ |
| Figure 1D      | PV<br>$p < 0.001$                               | CaMKII<br>$p = 0.1185$                         | /                                                | NA                                            | NA           |
| Figure 1F      | Sham<br>$p = 0.7842$                            | MCAO<br>$p = 0.5075$                           | /                                                | F(35,35) = 1.802                              | $p = 0.0858$ |
| Figure 1G      | Sham<br>$p = 0.0860$                            | MCAO<br>$p = 0.5324$                           | /                                                | F(35,35) = 1.313                              | $p = 0.4248$ |
| Figure 1H      | PV+ cells<br>$p = 0.5075$                       | CaMKII+ cells<br>$p = 0.5324$                  | /                                                | F(35,35) = 3.248                              | $p < 0.001$  |
| Figure 2F      | TRPM7 <sup>flox/flox</sup> MCAO<br>$p < 0.001$  | PV-TRPM7 <sup>-/-</sup> MCAO<br>$p = 0.0014$   | CaMKII-TRPM7 <sup>-/-</sup> MCAO<br>$p < 0.001$  | NA                                            | NA           |
| Figure 2G      | TRPM7 <sup>flox/flox</sup> MCAO<br>$p < 0.001$  | PV-TRPM7 <sup>-/-</sup> MCAO<br>$p = 0.0928$   | CaMKII-TRPM7 <sup>-/-</sup> MCAO<br>$p = 0.0192$ | NA                                            | NA           |
| Figure 3A      | TRPM7 <sup>flox/flox</sup> MCAO<br>$p = 0.4458$ | PV-TRPM7 <sup>-/-</sup> MCAO<br>$p = 0.4353$   | CaMKII-TRPM7 <sup>-/-</sup> MCAO<br>$p = 0.3673$ | F(2,159) = 1.994                              | $p = 0.1395$ |
| Figure 3B      | TRPM7 <sup>flox/flox</sup> MCAO<br>$p = 0.2828$ | PV-TRPM7 <sup>-/-</sup> MCAO<br>$p = 0.1559$   | CaMKII-TRPM7 <sup>-/-</sup> MCAO<br>$p = 0.7749$ | F(2,15) = 1.081                               | $p = 0.3644$ |
| Figure 3C      | TRPM7 <sup>flox/flox</sup> MCAO<br>$p < 0.001$  | PV-TRPM7 <sup>-/-</sup> MCAO<br>$p < 0.001$    | CaMKII-TRPM7 <sup>-/-</sup> MCAO<br>$p < 0.001$  | NA                                            | NA           |
| Figure 3D      | TRPM7 <sup>flox/flox</sup> MCAO<br>$p = 0.8775$ | PV-TRPM7 <sup>-/-</sup> MCAO<br>$p = 0.9538$   | CaMKII-TRPM7 <sup>-/-</sup> MCAO<br>$p = 0.5751$ | F(2,15) = 2.679                               | $p = 0.1012$ |
| Figure 3E      | TRPM7 <sup>flox/flox</sup> MCAO<br>$p < 0.001$  | PV-TRPM7 <sup>-/-</sup> MCAO<br>$p = 0.0069$   | CaMKII-TRPM7 <sup>-/-</sup> MCAO<br>$p < 0.001$  | NA                                            | NA           |
| Figure 3F      | TRPM7 <sup>flox/flox</sup> MCAO<br>$p = 0.1073$ | PV-TRPM7 <sup>-/-</sup> MCAO<br>$p = 0.3445$   | CaMKII-TRPM7 <sup>-/-</sup> MCAO<br>$p = 0.3764$ | F(2,15) = 0.8032                              | $p = 0.4662$ |
| Figure 3G      | TRPM7 <sup>flox/flox</sup> MCAO<br>$p = 0.6246$ | PV-TRPM7 <sup>-/-</sup> MCAO<br>$p = 0.1134$   | CaMKII-TRPM7 <sup>-/-</sup> MCAO<br>$p = 0.2300$ | F(2,15) = 3.221                               | $p = 0.0686$ |
| Figure 4A      | TRPM7 <sup>flox/flox</sup> MCAO<br>$p < 0.001$  | PV-TRPM7 <sup>-/-</sup> MCAO<br>$p = 0.1699$   | CaMKII-TRPM7 <sup>-/-</sup> MCAO<br>$p = 0.0245$ | NA                                            | NA           |
| Figure 4B      | TRPM7 <sup>flox/flox</sup> MCAO<br>$p = 0.8299$ | PV-TRPM7 <sup>-/-</sup> MCAO<br>$p = 0.0932$   | CaMKII-TRPM7 <sup>-/-</sup> MCAO<br>$p = 0.0260$ | NA                                            | NA           |
| Figure 4C left | TRPM7 <sup>flox/flox</sup> Sham<br>$p = 0.7433$ | TRPM7 <sup>flox/flox</sup> MCAO<br>$p < 0.001$ | PV-TRPM7 <sup>-/-</sup> MCAO<br>$p < 0.001$      | NA                                            | NA           |

|                    |                                                 |                                                |                                                     |                  |              |
|--------------------|-------------------------------------------------|------------------------------------------------|-----------------------------------------------------|------------------|--------------|
| Figure 4C<br>right | TRPM7 <sup>flox/flox</sup> Sham<br>$p = 0.0018$ | TRPM7 <sup>flox/flox</sup> MCAO<br>$p < 0.001$ | PV-TRPM7 <sup>-/-</sup> MCAO<br>$p < 0.001$         | NA               | NA           |
| Figure 4D          | TRPM7 <sup>flox/flox</sup> MCAO<br>$p = 0.0760$ | PV-TRPM7 <sup>-/-</sup> MCAO<br>$p = 0.5786$   | CaMKII-TRPM7 <sup>-/-</sup><br>MCAO<br>$p = 0.4288$ | F(2,159) = 3.172 | $p = 0.0446$ |
| Figure 4E          | TRPM7 <sup>flox/flox</sup> MCAO<br>$p = 0.3161$ | PV-TRPM7 <sup>-/-</sup> MCAO<br>$p = 0.0035$   | CaMKII-TRPM7 <sup>-/-</sup><br>MCAO<br>$p = 0.4105$ | NA               | NA           |
| Figure 4F          | TRPM7 <sup>flox/flox</sup> MCAO<br>$p = 0.4185$ | PV-TRPM7 <sup>-/-</sup> MCAO<br>$p < 0.001$    | CaMKII-TRPM7 <sup>-/-</sup><br>MCAO<br>$p < 0.001$  | NA               | NA           |
| Figure 4G          | TRPM7 <sup>flox/flox</sup> MCAO<br>$p = 0.0399$ | PV-TRPM7 <sup>-/-</sup> MCAO<br>$p = 0.1302$   | CaMKII-TRPM7 <sup>-/-</sup><br>MCAO<br>$p = 0.2475$ | NA               | NA           |
